# Supplementary material for: A clean and effective potassium hydroxide pretreatment of corncob residue for the enhancement of enzymatic hydrolysis at high solids loading
Source: PubMed Central journal article supplement — RSC Adv. 2019 Apr 11;9(20):11558–66. doi: 10.1039/c9ra01555h (PMC9063351; doi:10.1039/c9ra01555h), 2019-04-11
Supplement: RA-009-C9RA01555H-s001.pdf [file RA-009-C9RA01555H-s001.pdf]

## Supporting information

### **A clean and effective potassium hydroxide pretreatment of corncob residue for the enhancement of enzymolysis at high solid loading**

*Xuwen Chi,<sup>a,b</sup> Chao Liu,<sup>b</sup> Yan-Hong Bi,<sup>a</sup> Guang Yu,<sup>b</sup> Yuedong Zhang,<sup>b</sup> Zhaoyu*

*Wang,<sup>\*,c,d</sup> Bin Li,<sup>\*,b</sup> Qiu Cui<sup>b</sup>*

<sup>a</sup> School of Life Science and Food Engineering, Huaiyin Institute of Technology, Huai'an, Jiangsu, 223003, China

<sup>b</sup> CAS Key Laboratory of Biofuels, CAS Key Laboratory of Bio-based Material, Dalian National Laboratory of Clean Energy, Qingdao Institute of Bioenergy and Bioprocess Technology, Chinese Academy of Sciences, Qingdao, Shandong, 266101, China

## Corresponding authors

\*Z. Wang. Tel.: +86-517-83559565. Fax.: +86-517-8355-9982. E-mail address:

[biowzy@126.com](mailto:biowzy@126.com) (Z. Wang);

\*B. Li. Tel.: +86-532-80662725. Fax.: +86-532-80662724. E-mail address:

[libin@qibebt.ac.cn](mailto:libin@qibebt.ac.cn) (B. Li).

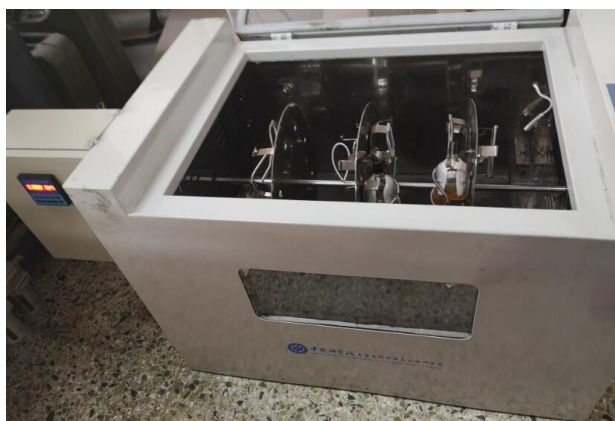

**Figure S1.** The self-made incubator with vertical rotary disc for enzymatic hydrolysis at high solid loading.

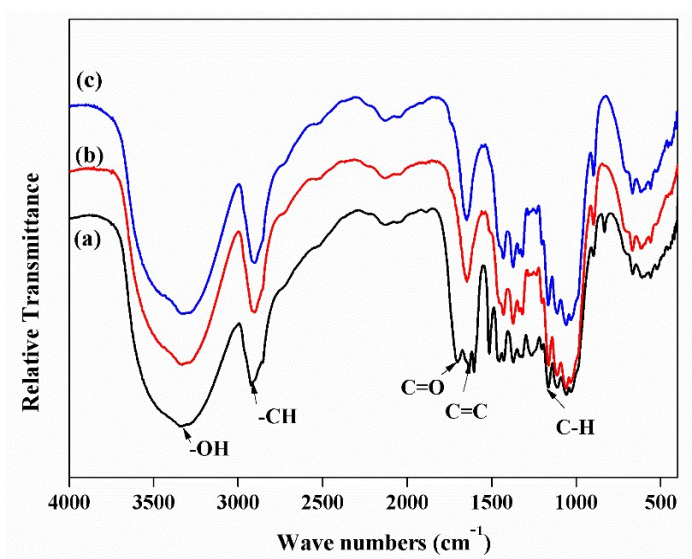

**Figure S2.** FTIR spectra of CCR samples before and after KOH pretreatment (a, raw CCR; b, pretreated CCR with 10 wt.% KOH; c, pretreated CCR with 16 wt.% KOH).

**Table S1.** Summary of CCR chemical band assignment of FTIR

| Band position (cm <sup>-1</sup> ) | Assignment                                                 |
|-----------------------------------|------------------------------------------------------------|
| 3430                              | -OH stretching                                             |
| 2900                              | C-H stretching (CH <sub>2</sub> )                          |
| 1715                              | C=O stretching in lignin                                   |
| 1640                              | O-H bending of absorbed water                              |
| 1600, 1510                        | aromatic skeletal vibration of lignin                      |
| 1314                              | CH <sub>2</sub> rocking vibration at C6                    |
| 1261                              | C-O stretching in esters of Ar-O                           |
| 1168, 1106, 1057, 1031            | C-O-C asymmetrical stretching                              |
| 898                               | C-O-C stretching at the $\beta$ -(1-4)-glycosidic linkages |
| 832                               | CH out-of-plane deformation of benzenes                    |
| 662                               | C-OH out-of-plane bending                                  |

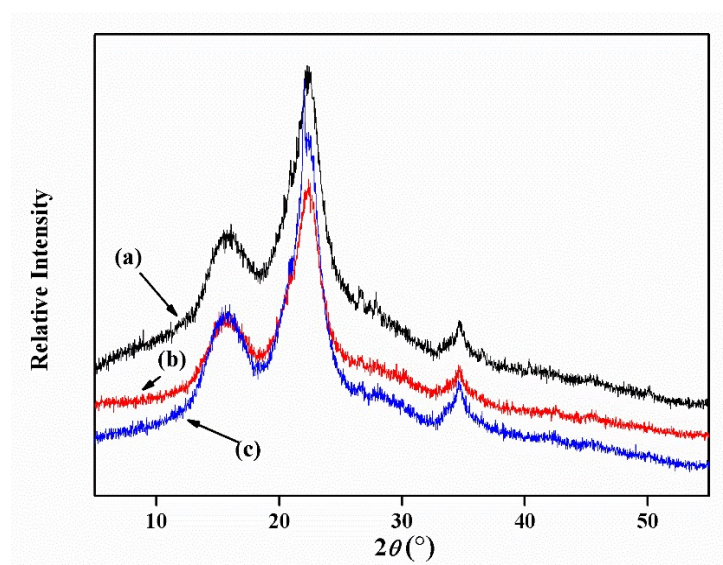

**Figure S3.** XRD patterns of CCR samples before and after KOH pretreatment (a, raw CCR; b, pretreated CCR with 10 wt.% KOH; c, pretreated CCR with 16 wt.% KOH).
